# Supplementary material for: Impacts of Changing Hydrology on Ravine Growth: Experimental Results
Source: Copernicus journal article supplement (doi:10.5194/hess-2017-567), 2017-10-10
Supplement: Supplementary file [file hess-2017-567-AC5-supplement.pdf]

## Supplementary Materials

### Run 1:

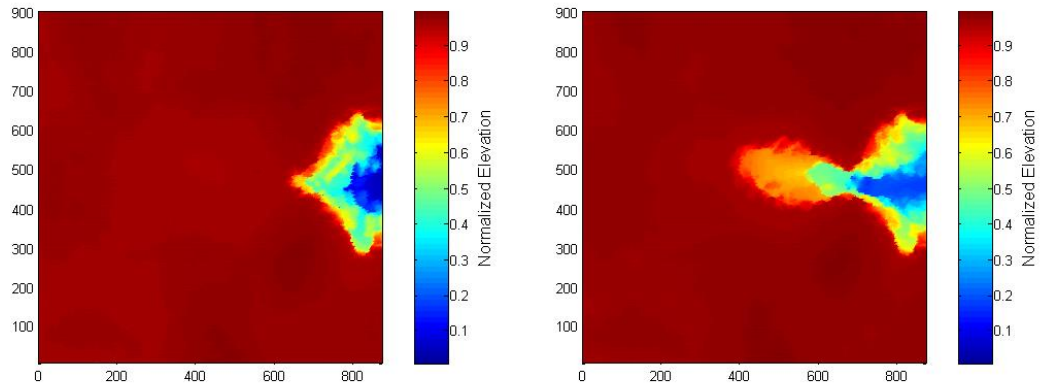

**Scan 2:** 15 min & 0.00409 m<sup>3</sup> removed

**Scan 3:** 30 min & 0.00657 m<sup>3</sup> removed

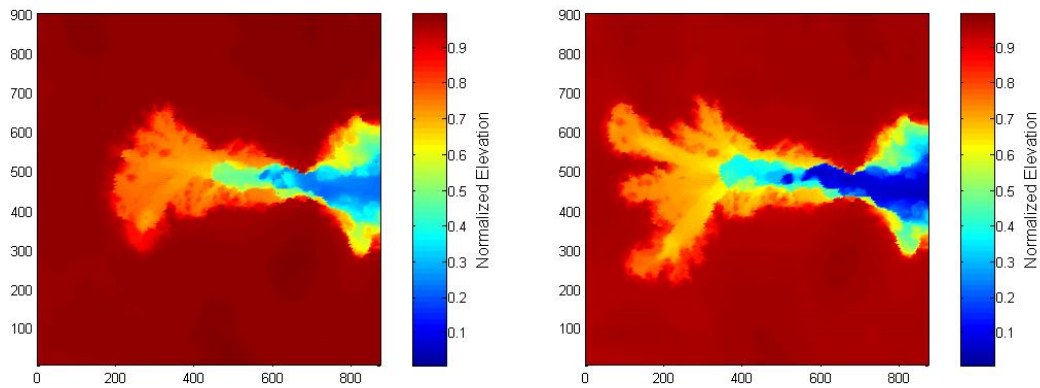

**Scan 4:** 45 min & 0.00981 m<sup>3</sup> removed

**Scan 5:** 60 min & 0.01192 m<sup>3</sup> removed

$D_{50} = 12 \mu\text{m}$

Total Volume = 190 L

Total Run Time = 60 minutes

Flow Rate = 52.58 ml/sec

Total Volume Removed: 0.01192 m<sup>3</sup>

**Run 2:**

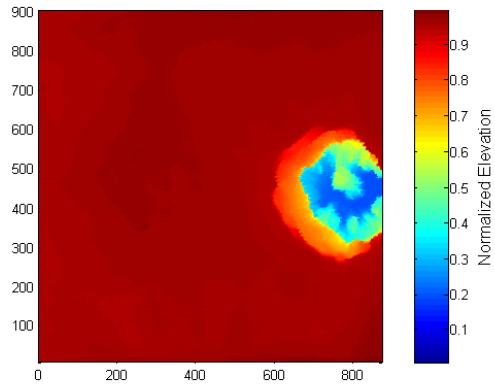

**Scan 2:** 8 min & 0.00585 m<sup>3</sup> removed

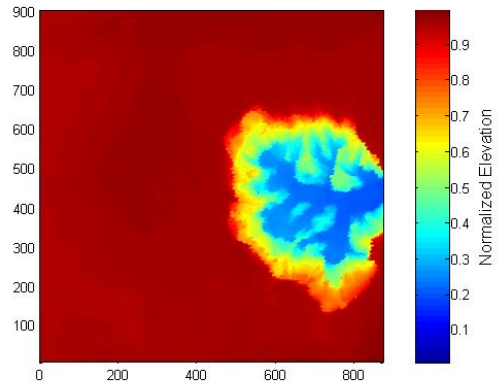

**Scan 3:** 16 min & 0.01473 m<sup>3</sup> removed

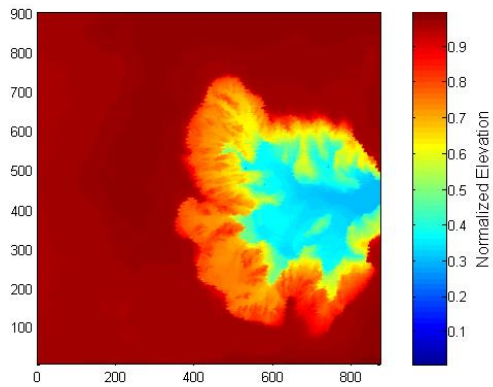

**Scan 4:** 24 min & 0.01992 m<sup>3</sup> removed

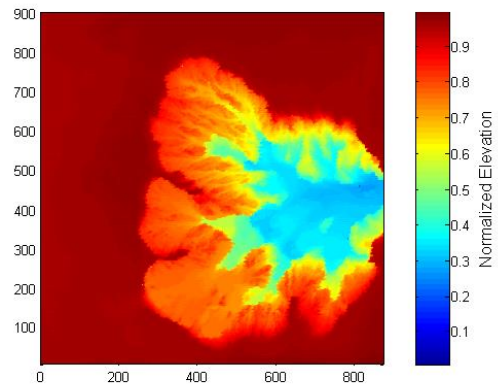

**Scan 5:** 32 min & 0.02451 m<sup>3</sup> removed

$D_{50} = 12 \mu\text{m}$

Total Volume = 190 L

Total Run Time = 32 minutes

Flow Rate = 98.58 ml/sec

Total Volume Removed: 0.02451 m<sup>3</sup>

### Run 3:

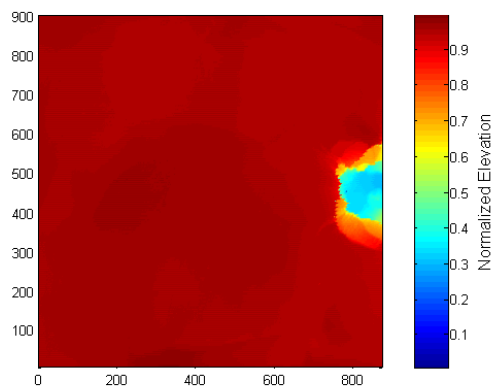

**Scan 2:** 4 min & 0.00259 m<sup>3</sup> removed

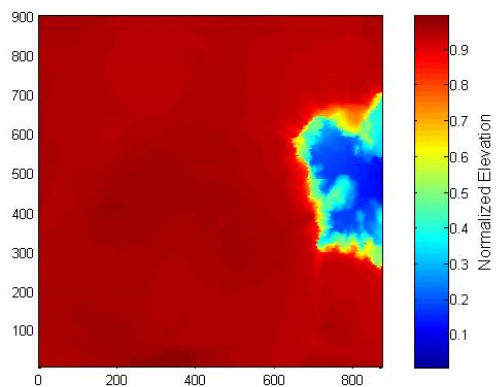

**Scan 3:** 8 min & 0.00778 m<sup>3</sup> removed

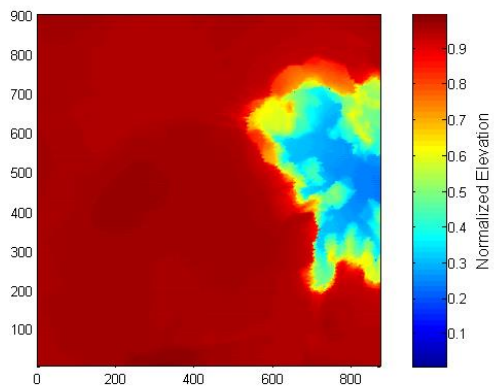

**Scan 4:** 12 min & 0.0133 m<sup>3</sup> removed

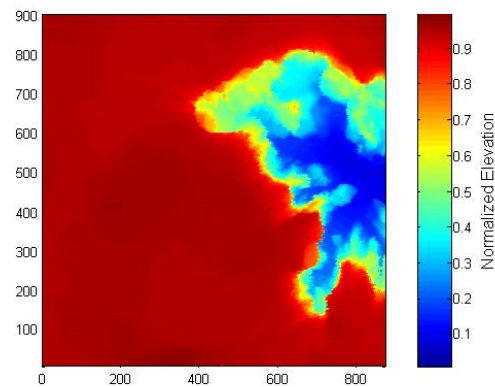

**Scan 5:** 16 min & 0.01794 m<sup>3</sup> removed

$D_{50} = 12 \mu\text{m}$

Total Volume = 190 L

Total Run Time = 16 minutes

Flow Rate = 197.16 ml/sec

Total Volume Removed: 0.01794 m<sup>3</sup>

**Run 4:**

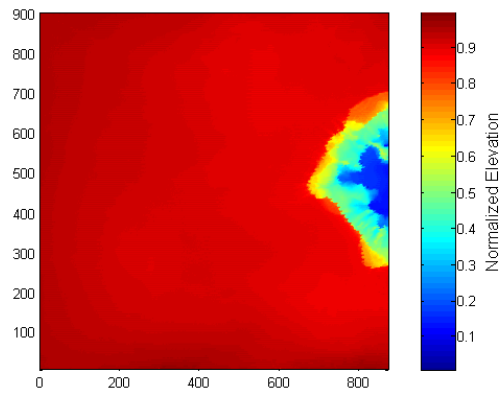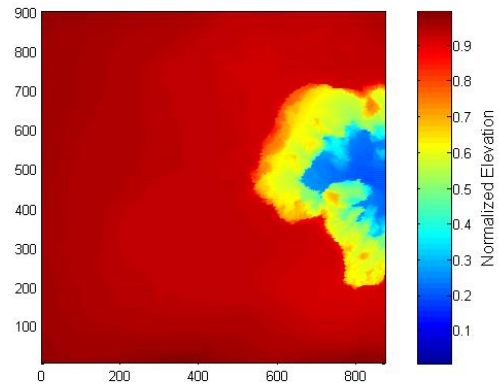

**Scan 2:** 6 min & 0.00404 m<sup>3</sup> removed

**Scan 3:** 12 min & 0.00908 m<sup>3</sup> removed

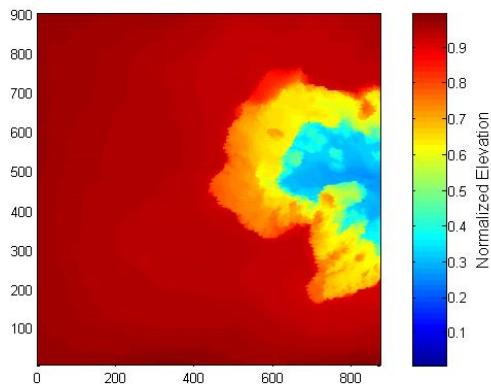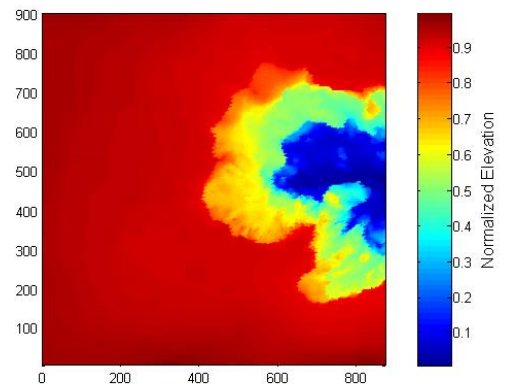

**Scan 4:** 18 min & 0.01256 m<sup>3</sup> removed

**Scan 5:** 21.25 min & 0.01378 m<sup>3</sup> removed

$D_{50} = 12 \mu\text{m}$

Total Volume = 190 L

Total Run Time = 21.25 minutes

Flow Rate = 148.45 ml/sec

Total Volume Removed: 0.01378 m<sup>3</sup>

**Run 5:**

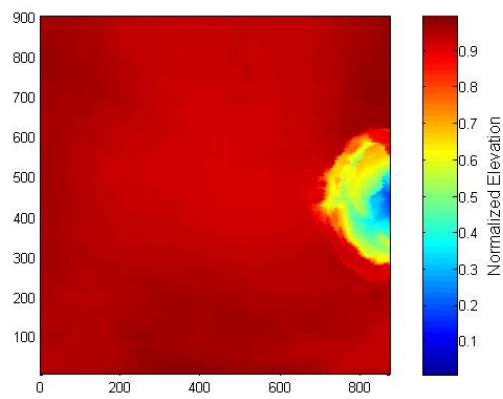

**Scan 2:** 4 min & 0.00330 m<sup>3</sup> removed

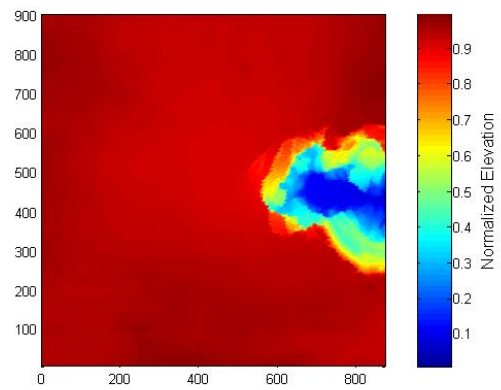

**Scan 3:** 8 min & 0.00735 m<sup>3</sup> removed

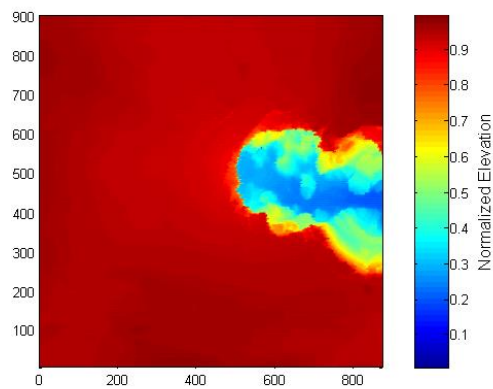

**Scan 4:** 11 min & 0.01038 m<sup>3</sup> removed

$D_{50} = 12 \mu\text{m}$

Total Volume = 190 L

Total Run Time = 11 minutes

Flow Rate = 286.77 ml/sec

Total Volume Removed: 0.01038 m<sup>3</sup>

**Run 6:**

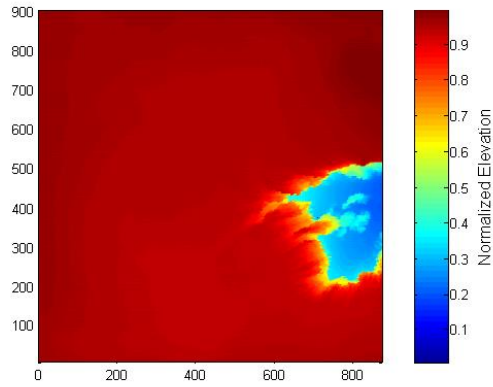

**Scan 2:** 30 min & 0.00638 m<sup>3</sup> removed

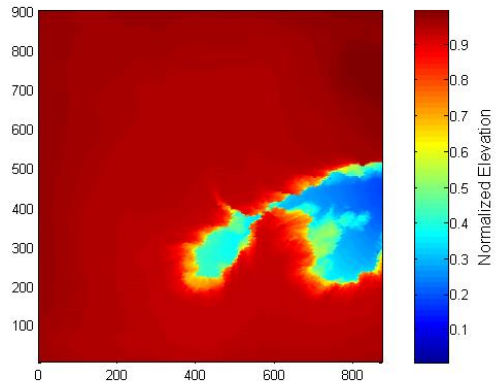

**Scan 3:** 60 min & 0.00901 m<sup>3</sup> removed

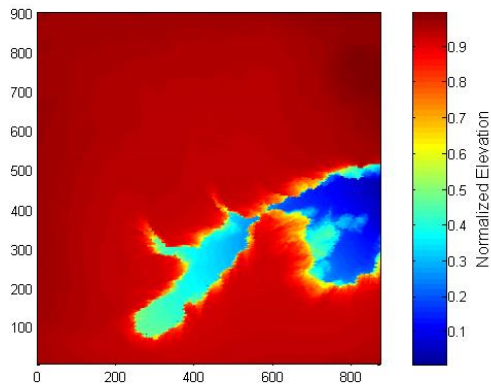

**Scan 4:** 90 min & 0.01056 m<sup>3</sup> removed

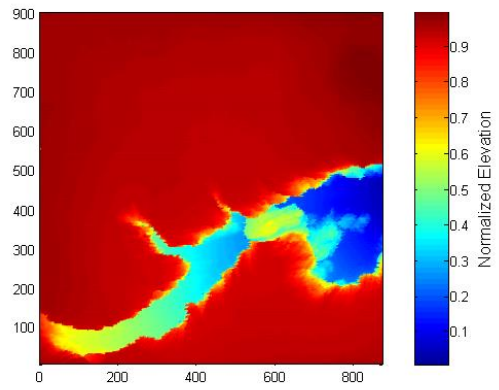

**Scan 5:** 120 min & 0.01185 m<sup>3</sup> removed

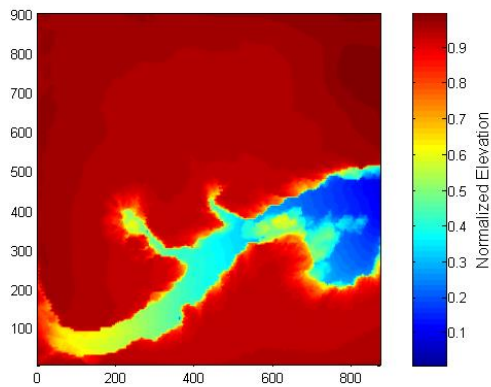

**Scan 6:** 150 min & 0.01255 m<sup>3</sup> removed

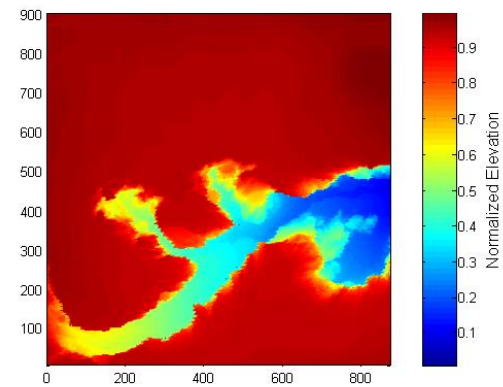

**Scan 7:** 360 min & 0.01390 m<sup>3</sup> removed

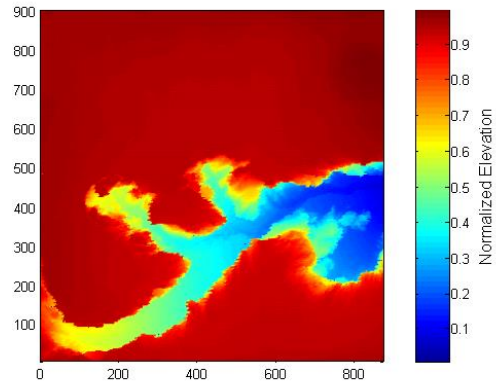

**Scan 8:** 738 min & 0.01490 m<sup>3</sup> removed

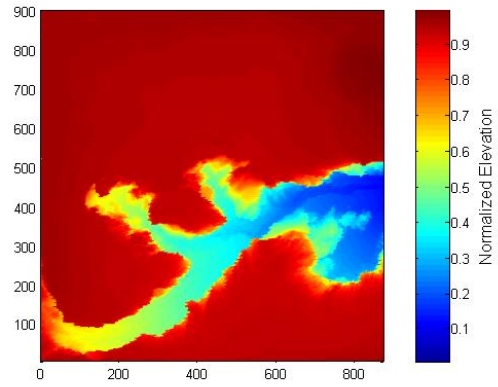

**Scan 9:** 872 min & 0.01490 m<sup>3</sup> removed

$D_{50} = 12 \mu\text{m}$

Total Volume = 190 L

Total Run Time = 872 minutes

Flow Rate = 3.62 ml/sec

Total Volume Removed: 0.01490 m<sup>3</sup>

**Run 7:**

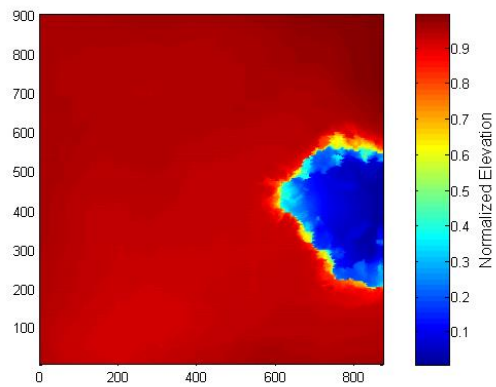

**Scan 2:** 10.13 min & 0.00891 m<sup>3</sup> removed

D<sub>50</sub> = 12 μm

Total Volume = 190 L

Total Run Time = 10.13 minutes

Flow Rate = 311.40 ml/sec

Total Volume Removed: 0.00891 m<sup>3</sup>



**Run 8:**

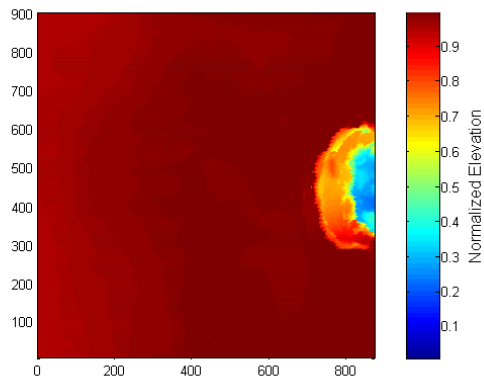

**Scan 2:** 6 min & 0.00310 m<sup>3</sup> removed

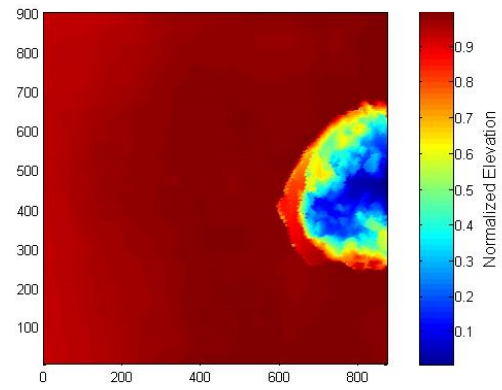

**Scan 3:** 12 min & 0.00738 m<sup>3</sup> removed

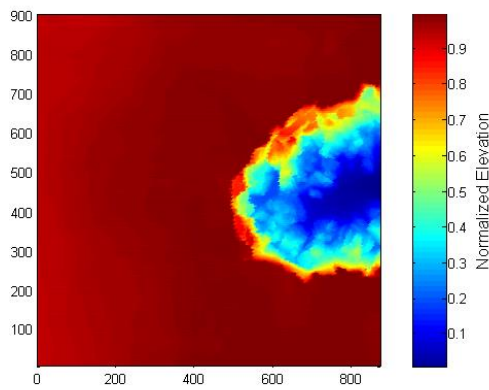

**Scan 4:** 21.5 min & 0.01391 m<sup>3</sup> removed

$D_{50} = 12 \mu\text{m}$

Total Volume = 190 L

Total Run Time = 21.5 minutes

Flow Rate = 146.72 ml/sec

Total Volume Removed: 0.01391 m<sup>3</sup>

**Run 9:**

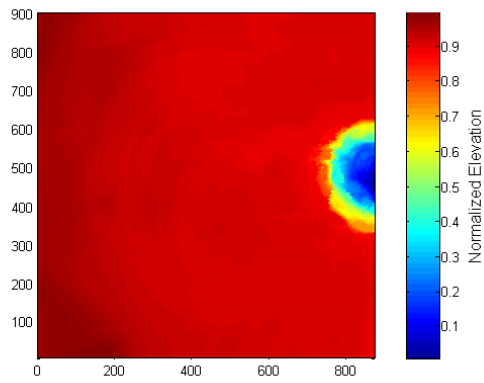

**Scan 2:** 3 min & 0.00203 m<sup>3</sup> removed

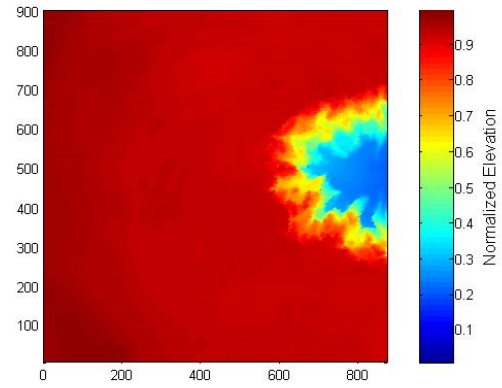

**Scan 3:** 6 min & 0.00720 m<sup>3</sup> removed

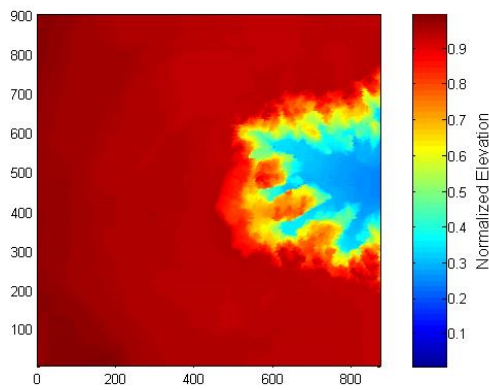

**Scan 4:** 9 min & 0.01139 m<sup>3</sup> removed

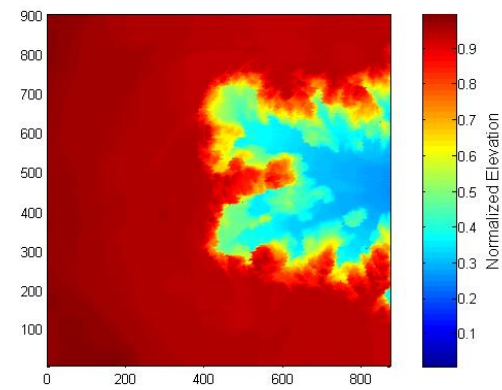

**Scan 5:** 15.5 min & 0.01865 m<sup>3</sup> removed

$D_{50} = 12 \mu\text{m}$

Total Volume = 190 L

Total Run Time = 15.5 minutes

Flow Rate = 203.52 ml/sec

Total Volume Removed: 0.01865 m<sup>3</sup>

**Run 10:**

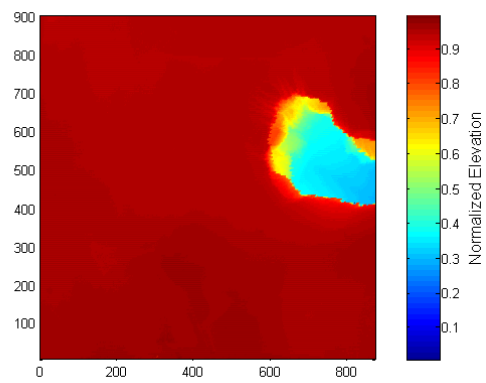

**Scan 2:** 15 min & 0.00688 m<sup>3</sup> removed

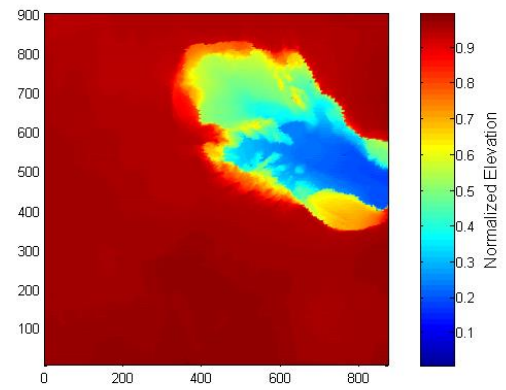

**Scan 3:** 30 min & 0.01542 m<sup>3</sup> removed

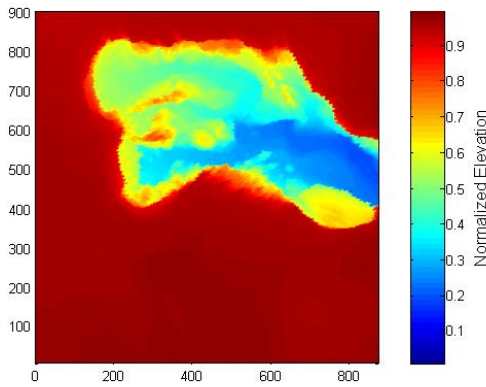

**Scan 4:** 44 min & 0.02316 m<sup>3</sup> removed

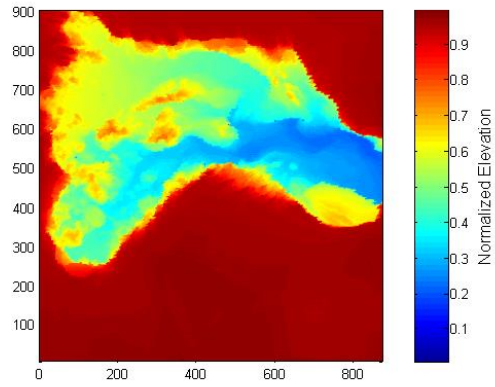

**Scan 5:** 59 min & 0.03200 m<sup>3</sup> removed

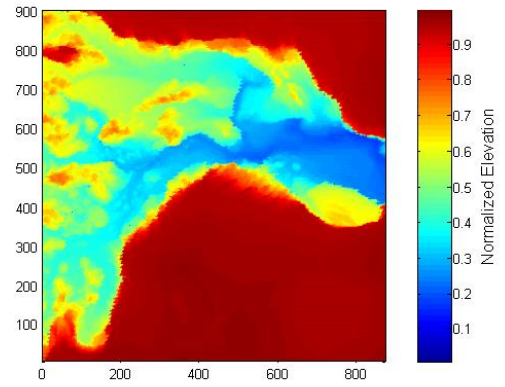

**Scan 6:** 74 min & 0.03795 m<sup>3</sup> removed

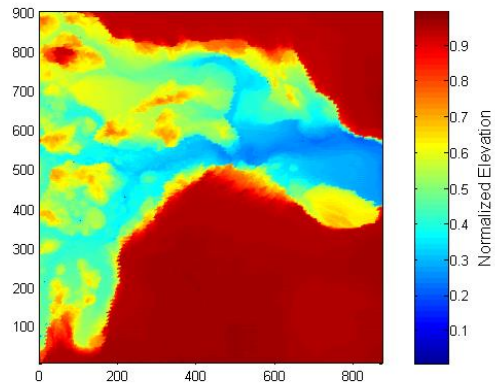

**Scan 7:** 91.5 min & 0.03905 m<sup>3</sup> removed

$D_{50} = 12 \mu\text{m}$

Total Volume = 380 L

Total Run Time = 91.5 minutes

1<sup>st</sup> 190L Flow Rate = 71.69 ml/sec

2<sup>nd</sup> 190L Flow Rate = 66.41 ml/sec

1<sup>st</sup> Half Total Volume Removed = 0.02316 m<sup>3</sup>

Total Volume Removed: 0.03905 m<sup>3</sup>

**Run 11:**

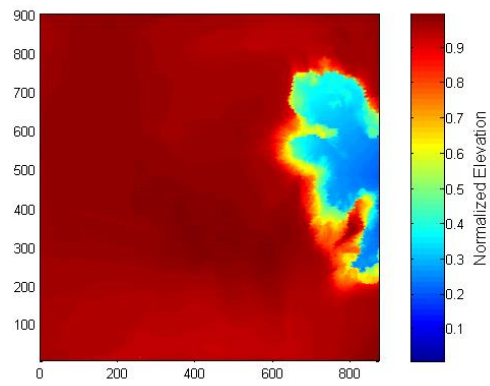

**Scan 2:** 15 min & 0.01031m<sup>3</sup> removed

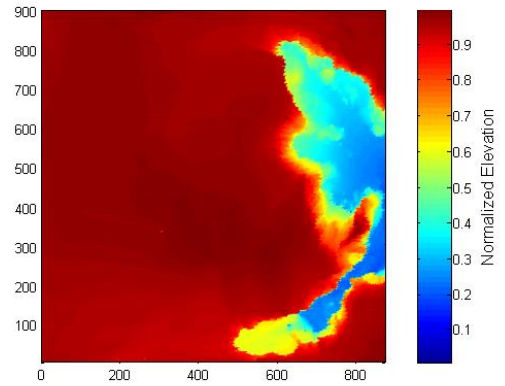

**Scan 3:** 30 min & 0.01390 m<sup>3</sup> removed

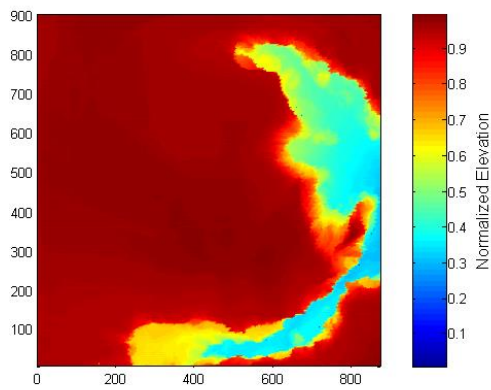

**Scan 4:** 43 min & 0.01712 m<sup>3</sup> removed

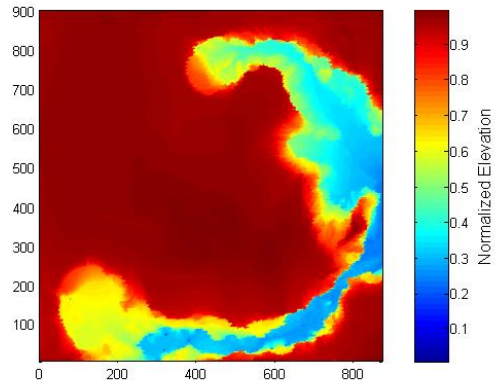

**Scan 5:** 51 min & 0.02218 m<sup>3</sup> removed

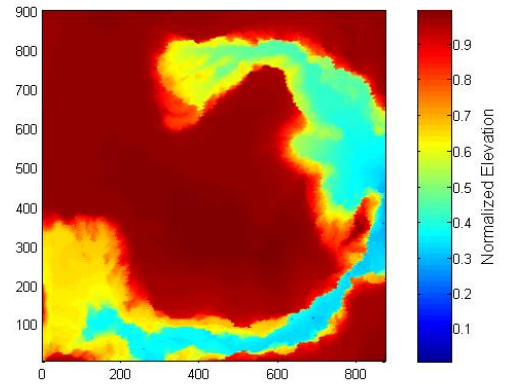

**Scan 6:** 59 min & 0.02739 m<sup>3</sup> removed

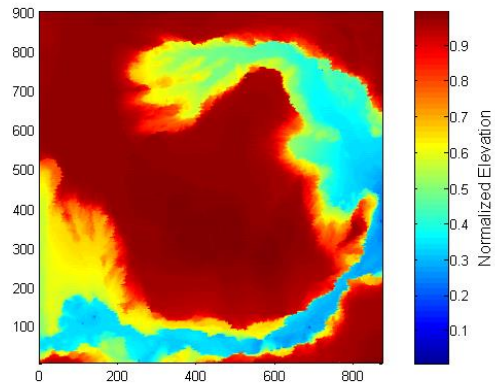

**Scan 7:** 65 min & 0.03016 m<sup>3</sup> removed

$D_{50} = 12 \mu\text{m}$

Total Volume = 380 L

Total Run Time = 65 minutes

1<sup>st</sup> 190L Flow Rate = 73.36 ml/sec

2<sup>nd</sup> 190L Flow Rate = 143.39 ml/sec

1<sup>st</sup> Half Total Volume Removed = 0.01712 m<sup>3</sup>

Total Volume Removed: 0.03016 m<sup>3</sup>

**Run 12:**

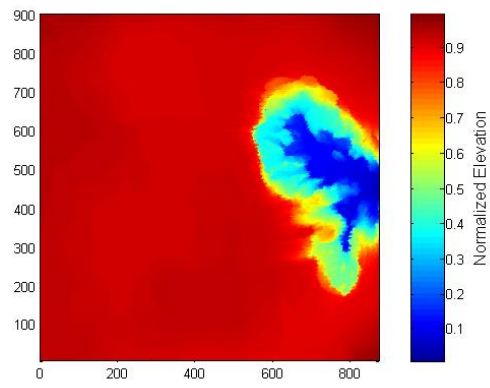

**Scan 2:** 15 min & 0.01096 m<sup>3</sup> removed

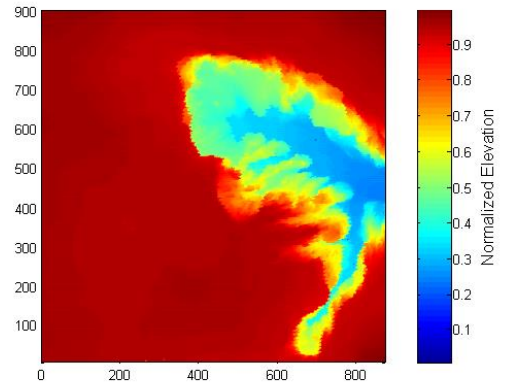

**Scan 3:** 30 min & 0.01917 m<sup>3</sup> removed

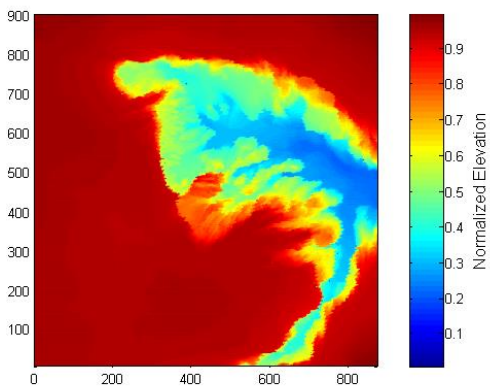

**Scan 4:** 41 min & 0.02338 m<sup>3</sup> removed

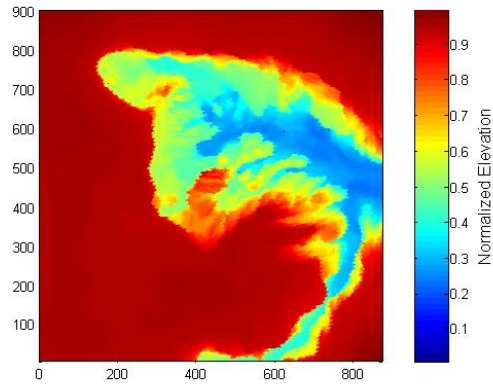

**Scan 5:** 45 min & 0.02665 m<sup>3</sup> removed

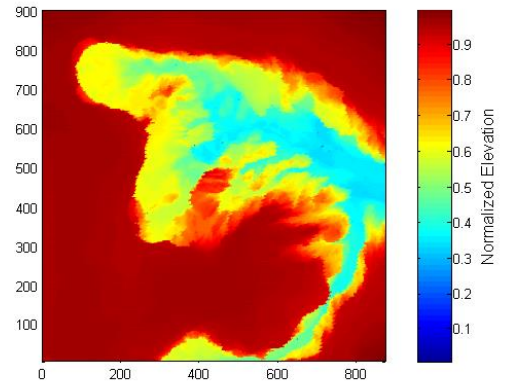

**Scan 6:** 49 min & 0.03012 m<sup>3</sup> removed

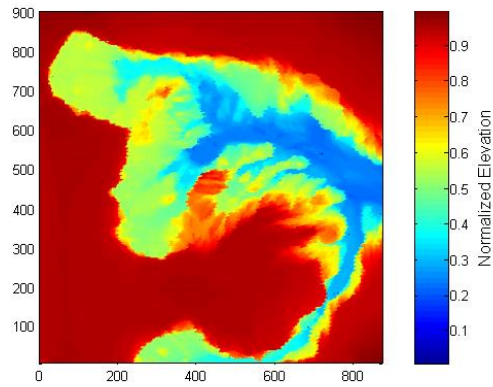

**Scan 7:** 53 min & 0.03385 m<sup>3</sup> removed

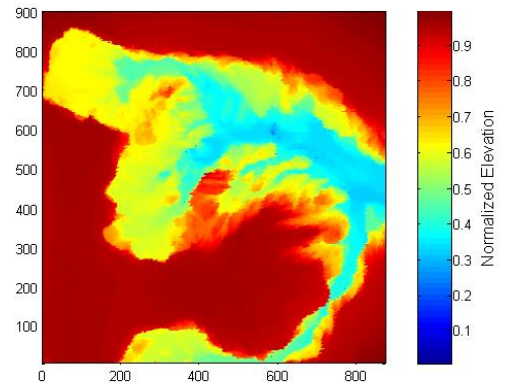

**Scan 8:** 54.5 min & 0.03553 m<sup>3</sup> removed

$D_{50} = 12 \mu\text{m}$

Total Volume = 380 L

Total Run Time = 54.5 minutes

1<sup>st</sup> 190L Flow Rate = 76.94 ml/sec

2<sup>nd</sup> 190L Flow Rate = 233.67 ml/sec

1<sup>st</sup> Half Total Volume Removed = 0.02338 m<sup>3</sup>

Total Volume Removed: 0.03553 m<sup>3</sup>



**Run 13:**

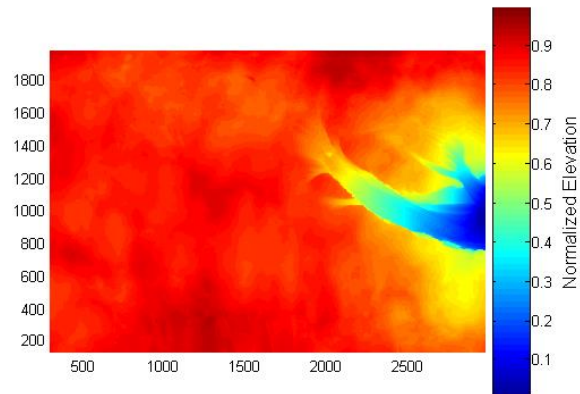

**Scan 2:** 6.5 min & 0.01002 m<sup>3</sup> removed

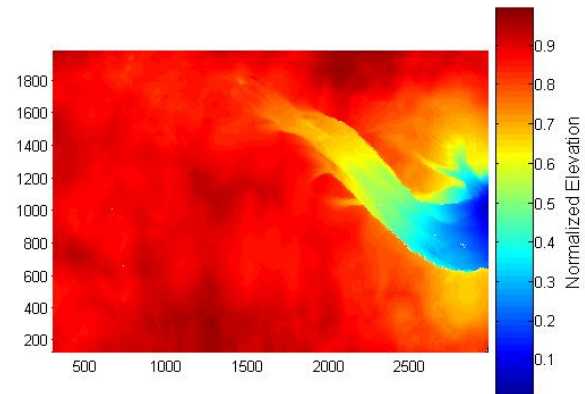

**Scan 3:** 25.25 min & 0.01776 m<sup>3</sup> removed

$D_{50} = 96 \mu\text{m}$

Total Volume = 190 L

Total Run Time = 25.25 minutes

Flow Rate = 124.93 ml/sec

Total Volume Removed: 0.01776 m<sup>3</sup>

**Run 14:**

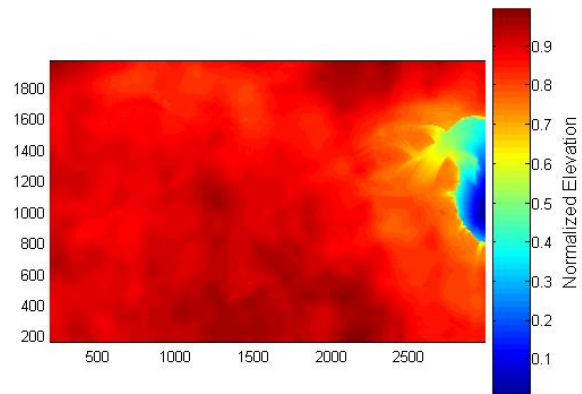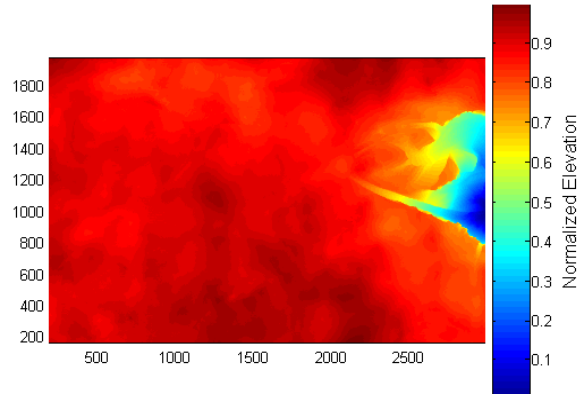

**Scan 2:** 10 min & 0.00506 m<sup>3</sup> removed

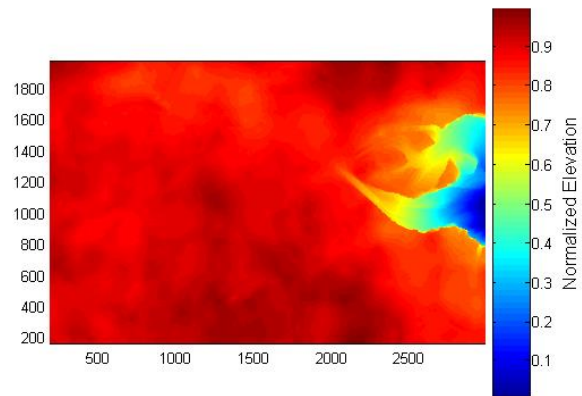

**Scan 3:** 20 min & 0.00877 m<sup>3</sup> removed

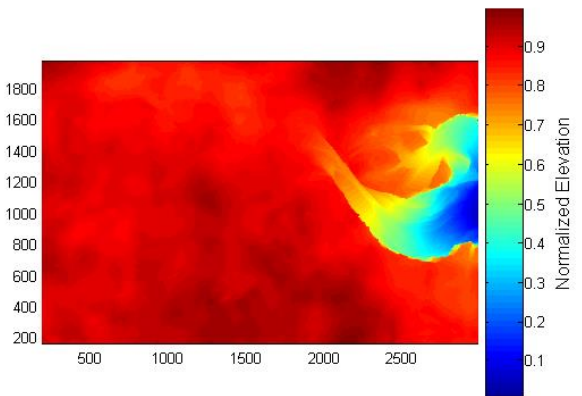

**Scan 4:** 30 min & 0.01067 m<sup>3</sup> removed

**Scan 5:** 56.5 min & 0.01865 m<sup>3</sup> removed

$D_{50} = 96 \mu\text{m}$

Total Volume = 190 L

Total Run Time = 56.5 minutes

Flow Rate = 55.83 ml/sec

Total Volume Removed:  $0.01865 \text{ m}^3$

**Run 15:**

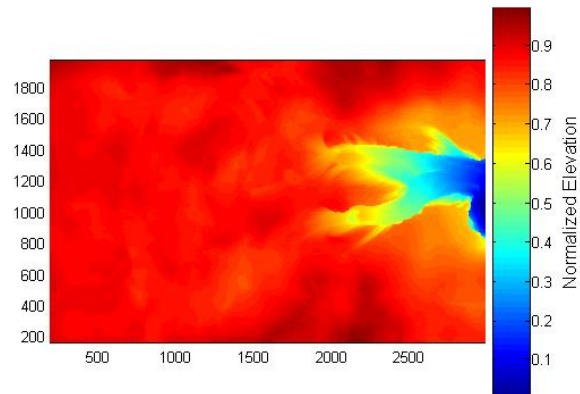

**Scan 2:** 6 min & 0.01496 m<sup>3</sup> removed

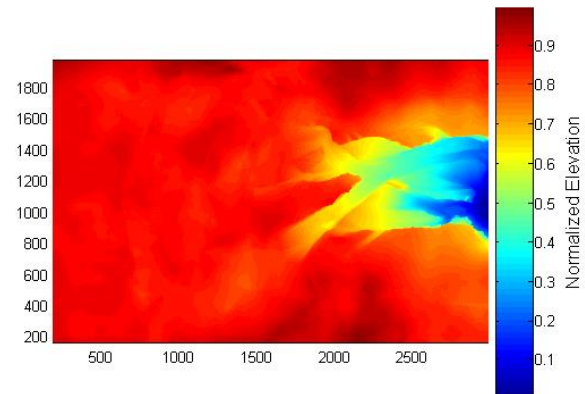

**Scan 3:** 13.5 min & 0.02380 m<sup>3</sup> removed

$D_{50} = 96 \mu\text{m}$

Total Volume = 190 L

Total Run Time = 13.5 minutes

Flow Rate = 233.67 ml/sec

Total Volume Removed: 0.02380 m<sup>3</sup>

**Run 16:**

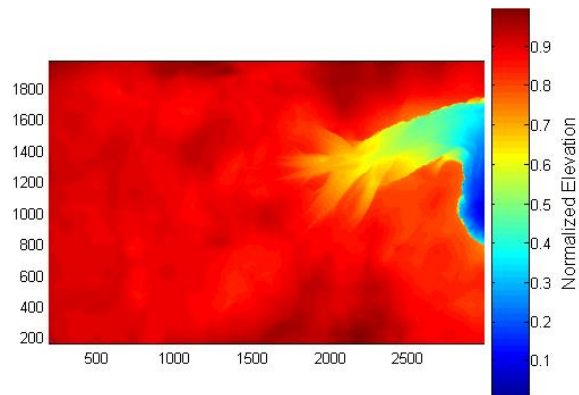

**Scan 2:** 12 min & 0.01659 m<sup>3</sup> removed

$D_{50} = 96 \mu\text{m}$

Total Volume = 190 L

Total Run Time = 12 minutes

Flow Rate = 262.88 ml/sec

Total Volume Removed: 0.01659 m<sup>3</sup>

**Run 17:**

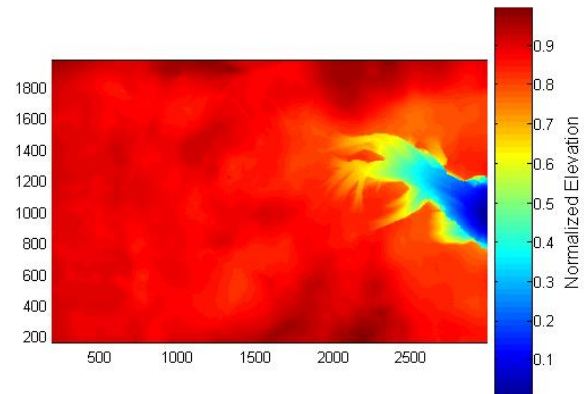

**Scan 2:** 7 min & 0.01459 m<sup>3</sup> removed

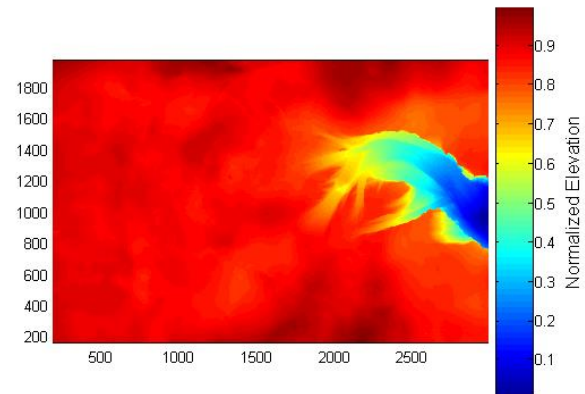

**Scan 3:** 14min & 0.02007 m<sup>3</sup> removed

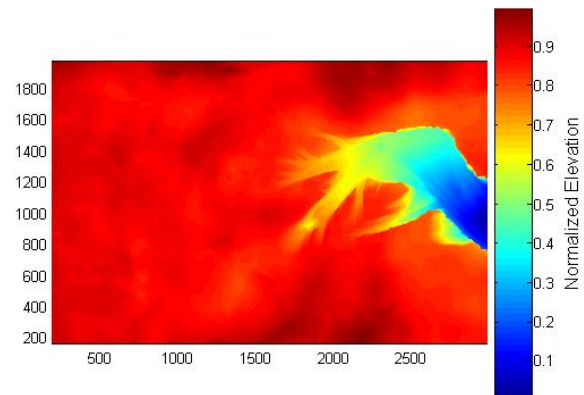

**Scan 4:** 20.25 min & 0.02357 m<sup>3</sup> removed

$$D_{50} = 96 \mu\text{m}$$

$$\text{Total Volume} = 190 \text{ L}$$

$$\text{Total Run Time} = 20.25 \text{ minutes}$$

$$\text{Flow Rate} = 155.78 \text{ ml/sec}$$

$$\text{Total Volume Removed} = 0.02357 \text{ m}^3$$

**Run 18:**

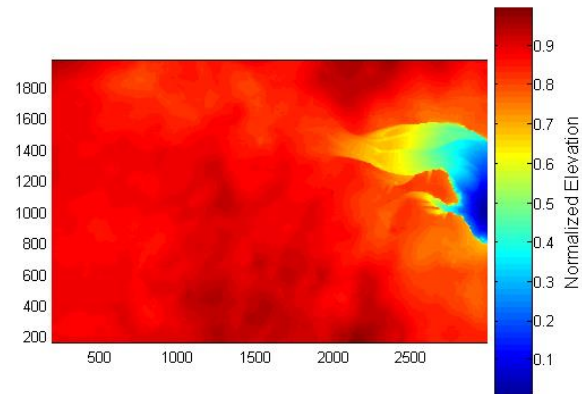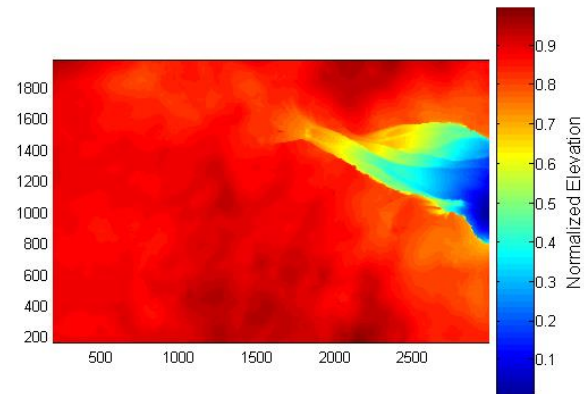

**Scan 2:** 15 min & 0.01221 m<sup>3</sup> removed

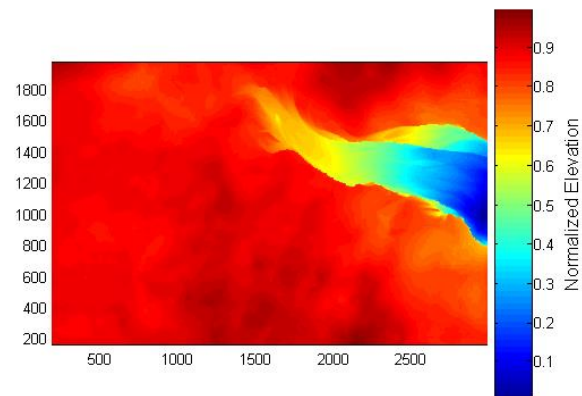

**Scan 3:** 39 min & 0.01999 m<sup>3</sup> removed

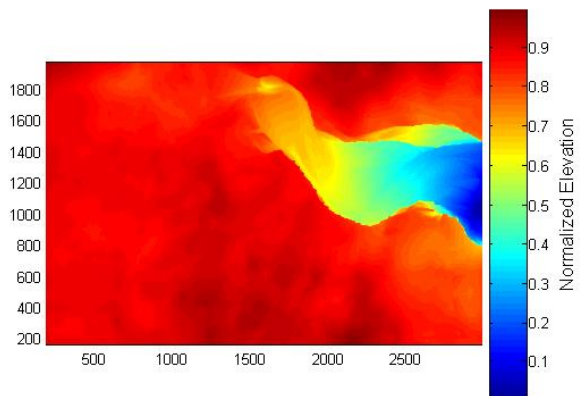

**Scan 4:** 45 min & 0.02508 m<sup>3</sup> removed

**Scan 5:** 56 min & 0.03117 m<sup>3</sup> remove



$$D_{50} = 96 \mu\text{m}$$

$$\text{Total Volume} = 380 \text{ L}$$

$$\text{Total Run Time} = 56 \text{ minutes}$$

$$1^{\text{st}} \text{ 190L Flow Rate} = 80.88 \text{ ml/sec}$$

$$2^{\text{nd}} \text{ 190L Flow Rate} = 185.56 \text{ ml/sec}$$

$$1^{\text{st}} \text{ Half Total Volume Removed} = 0.01999 \text{ m}^3$$

$$\text{Total Volume Removed: } 0.03117 \text{ m}^3$$

**Run 19:**

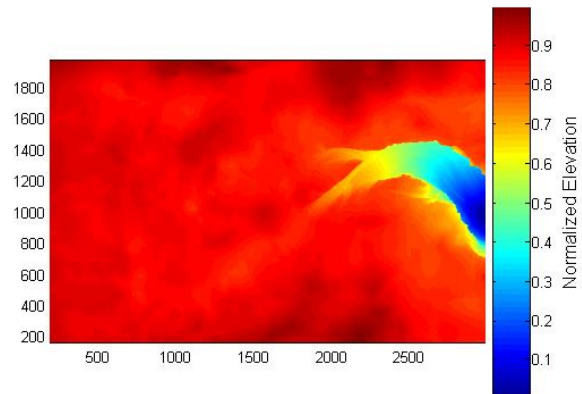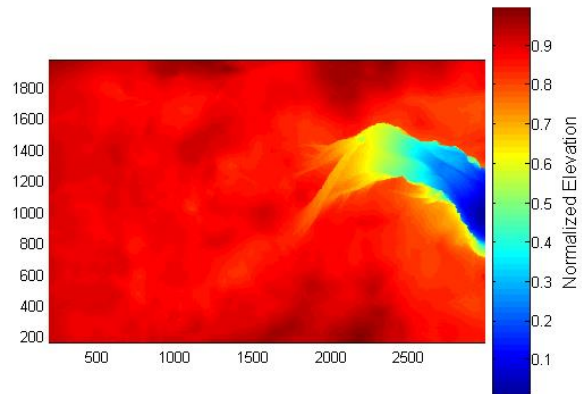

**Scan 2:** 26 min & 0.01109 m<sup>3</sup> removed

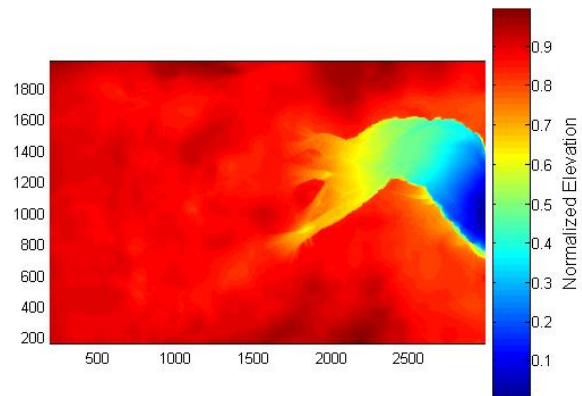

**Scan 3:** 57 min & 0.01566 m<sup>3</sup> removed

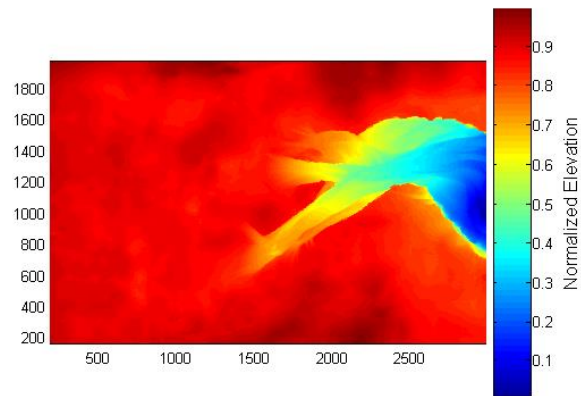

**Scan 4:** 64 min & 0.02415 m<sup>3</sup> removed

**Scan 5:** 71.5 min & 0.03059 m<sup>3</sup> removed

$$D_{50} = 96 \mu\text{m}$$

$$\text{Total Volume} = 380 \text{ L}$$

$$\text{Total Run Time} = 71.5 \text{ minutes}$$

$$1^{\text{st}} \text{ 190L Flow Rate} = 55.34 \text{ ml/sec}$$

$$2^{\text{nd}} \text{ 190L Flow Rate} = 217.55 \text{ ml/sec}$$

$$1^{\text{st}} \text{ Half Total Volume Removed} = 0.01566 \text{ m}^3$$

$$\text{Total Volume Removed: } 0.03059 \text{ m}^3$$

## Run 20

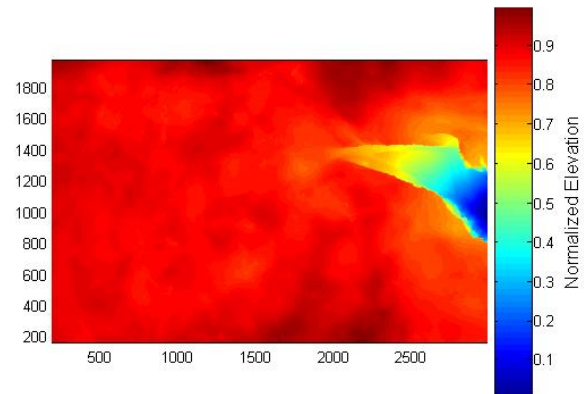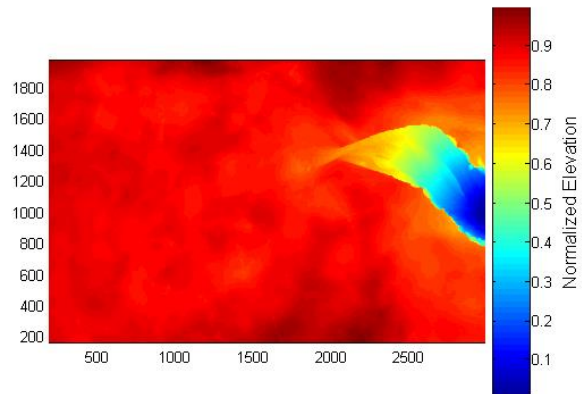

**Scan 2:** 25 min & 0.00925 m<sup>3</sup> removed

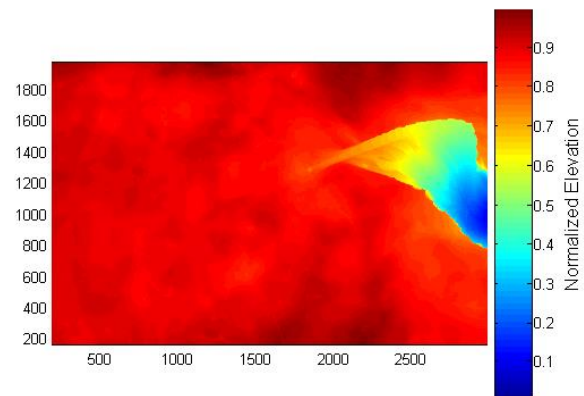

**Scan 3:** 50 min & 0.01368 m<sup>3</sup> removed

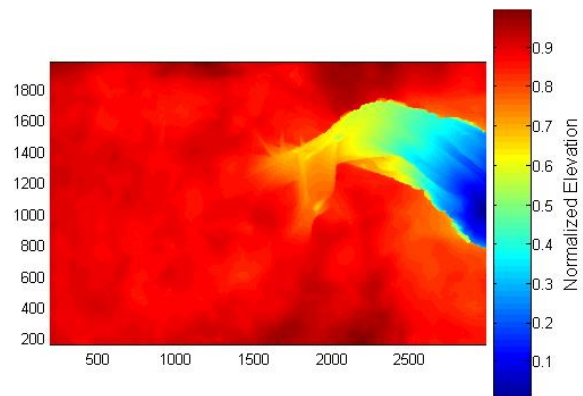

**Scan 4:** 75 min & 0.01587 m<sup>3</sup> removed

**Scan 5:** 89 min & 0.02803 m<sup>3</sup> remove

$D_{50} = 96 \mu\text{m}$

Total Volume = 380 L

Total Run Time = 42.06 minutes

1<sup>st</sup> 190L Flow Rate = 55.34 ml/sec

2<sup>nd</sup> 190L Flow Rate = 225.32 ml/sec

1<sup>st</sup> Half Total Volume Removed = 0.01587 m<sup>3</sup>

Total Volume Removed: 0.02803 m<sup>3</sup>
